# Supplementary material for: Exploring the Potentiality of Native Actinobacteria to Combat the Chilli Fruit Rot Pathogens under Post-Harvest Pathosystem
Source: MDPI journal article supplement (doi:10.3390/life13020426), 2023-02-02

**Supplementary Table S1:** *In vitro* antifungal activity of actinobacterial isolates against chilli fruit rot pathogens

| S. No. | Source             | Isolate code | <i>Colletotrichum scovillei</i> |         |               | <i>Colletotrichum truncatum</i> |         |               | <i>Fusarium oxysporum</i> |         |               |
|--------|--------------------|--------------|---------------------------------|---------|---------------|---------------------------------|---------|---------------|---------------------------|---------|---------------|
|        |                    |              | MG (cm)                         | ZI (cm) | PIMG (%)      | MG (cm)                         | ZI (cm) | PIMG (%)      | MG (cm)                   | ZI (cm) | PIMG (%)      |
| 1.     | Rhizosphere        | AR1          | 4.07                            | 2.4     | 54.46 (47.56) | 4.43                            | 2.3     | 50.58 (45.32) | 4.57                      | 2.1     | 49.26 (44.58) |
| 2.     |                    | AR2          | 4.90                            | 1.3     | 45.13 (42.22) | 5.33                            | 1.6     | 40.54 (39.53) | 4.53                      | 1.4     | 49.63 (44.79) |
| 3.     |                    | AR3          | 4.80                            | 1.1     | 46.25 (42.85) | 5.47                            | 0.5     | 39.06 (38.65) | 6.27                      | 0.4     | 30.37 (33.43) |
| 4.     |                    | AR4          | 4.30                            | 2.1     | 51.85 (46.07) | 4.47                            | 2.1     | 50.20 (45.11) | 4.67                      | 1.3     | 48.15 (43.94) |
| 5.     |                    | AR5          | 5.17                            | 1.3     | 42.14 (40.48) | 5.20                            | 1.3     | 42.03 (40.40) | 7.43                      | 0.9     | 17.41 (24.65) |
| 6.     |                    | AR6          | 4.83                            | 1.1     | 45.88 (42.63) | 6.23                            | 0.4     | 30.51 (33.48) | 6.73                      | 1.5     | 25.19 (30.11) |
| 7.     |                    | AR7          | 6.07                            | 0.5     | 32.06 (34.47) | 6.10                            | 1.2     | 32.00 (34.43) | 5.30                      | 1.7     | 41.11 (39.87) |
| 8.     |                    | AR8          | 5.60                            | 0.6     | 37.29 (37.64) | 6.60                            | 1.0     | 26.42 (30.91) | 6.37                      | 0.4     | 29.26 (32.76) |
| 9.     |                    | AR9          | 4.97                            | 1.5     | 44.38 (41.75) | 5.67                            | 1.2     | 36.83 (37.35) | 5.77                      | 0.8     | 35.93 (36.81) |
| 10.    |                    | AR10         | 3.67                            | 2.7     | 58.94 (50.17) | 3.93                            | 2.4     | 56.15 (48.52) | 4.23                      | 2.6     | 52.96 (46.70) |
| 11.    |                    | AR11         | 4.53                            | 2.0     | 49.23 (44.56) | 5.13                            | 1.1     | 42.7 (40.82)  | 5.43                      | 1.1     | 39.63 (39.00) |
| 12.    |                    | AR12         | 4.97                            | 1.4     | 44.38 (41.77) | 5.63                            | 1.4     | 37.20 (37.57) | 5.00                      | 1.5     | 44.44 (40.73) |
| 13.    |                    | AR13         | 4.60                            | 1.2     | 48.49 (44.13) | 7.13                            | 0.0     | 20.48 (26.88) | 4.80                      | 1.5     | 46.67 (43.09) |
| 14.    |                    | AR14         | 4.80                            | 1.5     | 46.25 (42.85) | 8.03                            | 0.3     | 10.44 (18.80) | 8.27                      | 0.0     | 8.15 (16.44)  |
| 15.    |                    | AR15         | 4.83                            | 1.6     | 45.88 (42.66) | 5.53                            | 1.2     | 38.31 (38.23) | 4.53                      | 0.9     | 49.63 (44.79) |
| 16.    |                    | AR16         | 4.90                            | 0.9     | 45.13 (42.21) | 6.67                            | 0.3     | 25.68 (30.42) | 5.93                      | 1.2     | 34.07 (35.69) |
| 17.    |                    | AR17         | 5.57                            | 0.0     | 37.66 (37.86) | 7.73                            | 0.0     | 13.79 (21.66) | 8.03                      | 0.0     | 10.74 (19.09) |
| 18.    |                    | AR18         | 4.83                            | 1.3     | 45.88 (42.64) | 6.20                            | 0.0     | 30.88 (33.73) | 6.73                      | 0.5     | 25.19 (30.10) |
| 19.    |                    | AR19         | 7.93                            | 0.0     | 11.16 (19.54) | 8.50                            | 0.0     | 5.24 (13.12)  | 6.87                      | 0.0     | 23.70 (29.12) |
| 20.    |                    | AR20         | 7.87                            | 0.5     | 11.91 (20.18) | 5.53                            | 1.2     | 38.31 (38.23) | 4.60                      | 2.1     | 48.89 (44.36) |
| 21.    |                    | AR21         | 6.17                            | 0.8     | 30.94 (33.78) | 7.03                            | 0.4     | 21.59 (27.67) | 5.03                      | 1.1     | 44.07 (41.58) |
| 22.    |                    | AR22         | 8.33                            | 0.4     | 6.68 (14.93)  | 7.17                            | 0.0     | 20.10 (26.61) | 6.27                      | 0.8     | 30.37 (33.43) |
| 23.    |                    | AR23         | 5.43                            | 1.5     | 39.16 (38.74) | 5.17                            | 1.2     | 42.40 (40.61) | 7.33                      | 0.1     | 18.52 (25.46) |
| 24.    |                    | AR24         | 5.67                            | 1.6     | 36.54 (37.21) | 5.10                            | 1.4     | 43.14 (41.05) | 4.83                      | 2.1     | 46.30 (42.88) |
| 25.    |                    | AR25         | 4.23                            | 2.7     | 52.59 (46.49) | 4.33                            | 1.4     | 51.69 (45.96) | 4.30                      | 2.2     | 52.22 (46.28) |
| 26.    |                    | AR26         | 2.87                            | 3.2     | 67.90 (55.51) | 3.30                            | 2.8     | 63.21 (52.65) | 3.57                      | 2.7     | 60.37 (50.99) |
| 27.    | Phyllosphere: Leaf | AL1          | 4.40                            | 0.8     | 50.73 (45.42) | 5.80                            | 0.6     | 35.34 (36.46) | 5.43                      | 1.7     | 39.63 (38.98) |
| 28.    |                    | AL2          | 7.73                            | 0.0     | 13.40 (21.46) | 5.27                            | 1.2     | 41.29 (39.97) | 6.10                      | 0.8     | 32.22 (34.58) |

|     |                         |         |       |       |                   |       |       |                  |       |       |                  |
|-----|-------------------------|---------|-------|-------|-------------------|-------|-------|------------------|-------|-------|------------------|
| 29. |                         | AL3     | 8.33  | 0.0   | 6.68<br>(14.99)   | 6.07  | 0.0   | 32.37<br>(34.66) | 7.57  | 0.0   | 15.93<br>(23.47) |
| 30. |                         | AL4     | 5.03  | 0.9   | 43.64<br>(41.35)  | 5.20  | 1.1   | 42.03<br>(40.40) | 5.43  | 1.4   | 39.63<br>(39.00) |
| 31. |                         | AL5     | 4.13  | 2.3   | 53.71<br>(47.13)  | 4.73  | 2.1   | 47.23<br>(43.40) | 4.40  | 2.4   | 51.11<br>(45.64) |
| 32. |                         | AL6     | 6.73  | 0.5   | 24.60<br>(29.73)  | 5.23  | 1.4   | 41.66<br>(40.18) | 7.53  | 0.0   | 16.30<br>(23.80) |
| 33. |                         | AL7     | 3.93  | 2.3   | 55.95<br>(48.43)  | 4.47  | 2.2   | 50.20<br>(45.11) | 4.20  | 2.3   | 53.33<br>(46.91) |
| 34. | Phyllosphere:<br>Stem   | ASt1    | 7.31  | 0.0   | 17.51<br>(24.69)  | 4.87  | 2.0   | 45.75<br>(42.54) | 6.07  | 0.7   | 32.59<br>(34.80) |
| 35. |                         | ASt2    | 7.03  | 0.4   | 21.24<br>(27.44)  | 6.20  | 0.1   | 30.88<br>(33.73) | 6.73  | 0.8   | 25.19<br>(30.11) |
| 36. |                         | ASt3    | 4.40  | 1.7   | 50.73<br>(45.42)  | 5.53  | 1.2   | 38.31<br>(38.23) | 5.17  | 1.0   | 42.59<br>(40.73) |
| 37. | Phyllosphere:<br>Seed   | ASe1    | 6.63  | 1.6   | 25.72<br>(30.49)  | 5.27  | 1.5   | 41.29<br>(39.96) | 5.07  | 1.2   | 43.70<br>(41.35) |
| 38. |                         | ASe2    | 6.43  | 0.8   | 27.96<br>(31.91)  | 5.57  | 1.3   | 37.94<br>(38.00) | 5.27  | 1.1   | 41.48<br>(40.09) |
| 39. |                         | ASe3    | 7.03  | 0.0   | 21.24<br>(27.42)  | 5.63  | 0.8   | 37.20<br>(37.55) | 5.37  | 1.0   | 40.37<br>(39.44) |
| 40. | Phyllosphere:<br>Fruits | AF1     | 6.20  | 1.3   | 30.57<br>(33.57)  | 5.60  | 1.2   | 37.57<br>(37.77) | 4.10  | 1.5   | 54.44<br>(47.55) |
| 41. |                         | AF2     | 6.17  | 1.1   | 30.94<br>(33.79)  | 5.33  | 1.2   | 40.54<br>(39.51) | 5.50  | 0.8   | 38.89<br>(38.58) |
| 42. |                         | AF3     | 5.33  | 0.7   | 40.28<br>(39.40)  | 5.10  | 1.3   | 43.14<br>(41.05) | 5.33  | 1.4   | 40.74<br>(39.66) |
| 43. | Endophyte: Leaf         | ALE1    | 8.50  | 0.0   | 4.82<br>(11.90)   | 5.80  | 0.9   | 35.34<br>(36.45) | 4.77  | 1.5   | 47.04<br>(43.30) |
| 44. |                         | ALE2    | 5.47  | 1.0   | 38.78<br>(38.52)  | 5.73  | 0.8   | 36.08<br>(36.90) | 6.00  | 0.5   | 33.33<br>(35.26) |
| 45. |                         | ALE3    | 5.90  | 0.6   | 33.93<br>(35.63)  | 6.17  | 0.5   | 31.25<br>(33.97) | 4.87  | 1.5   | 45.93<br>(42.66) |
| 46. |                         | ALE4    | 6.53  | 0.7   | 26.84<br>(31.22)  | 5.33  | 0.7   | 40.54<br>(39.49) | 6.27  | 0.7   | 30.37<br>(33.42) |
| 47. | Endophyte:<br>Stem      | AStE1   | 5.27  | 1.6   | 41.02<br>(39.83)  | 5.10  | 1.2   | 43.14<br>(41.05) | 7.23  | 0.3   | 19.63<br>(26.28) |
| 48. | Endophytes:<br>Seed     | ASeE2   | 7.03  | 0.2   | 21.24<br>(27.45)  | 5.33  | 1.3   | 40.54<br>(39.54) | 5.80  | 1.3   | 35.56<br>(36.60) |
| 49. |                         | ASeE3   | 5.87  | 0.8   | 34.30<br>(35.85)  | 5.63  | 0.0   | 37.20<br>(37.54) | 7.03  | 0.0   | 21.85<br>(27.86) |
| 50. | Endophytes:<br>Fruit    | AFE1    | 7.23  | 0.0   | 19.00<br>(25.82)  | 5.60  | 0.0   | 37.57<br>(37.77) | 8.23  | 0.0   | 8.52<br>(16.88)  |
| 51. |                         | AFE2    | 4.50  | 2.1   | 49.61<br>(44.77)  | 4.77  | 2.1   | 46.86<br>(43.19) | 4.50  | 2.1   | 50.00            |
| 52. |                         | AFE3    | 7.17  | 0.4   | 19.75<br>(26.319) | 5.30  | 1.4   | 40.91<br>(39.74) | 5.67  | 1.1   | 37.04<br>(45.00) |
| 53. |                         | Control | 8.93  | 0.0   | 54.46             | 8.97  | 0.0   | 50.58<br>(0.29)  | 9.00  | 0.0   | 0.00             |
| 54. |                         | SE(d)   | 0.036 | 0.049 | 1.481             | 0.040 | 0.064 | 1.366            | 0.046 | 0.062 | 1.589            |
| 55. |                         | CD      | 0.071 | 0.098 | 2.941             | 0.080 | 0.128 | 2.713            | 0.091 | 0.123 | 3.156            |

Values are mean of three replications. Means in a column followed by same superscript letters are not significantly different according to Duncan's multiple range test at  $P = 0.05$ . Values in parenthesis are arc sine transformed; **MG**: Mycelial growth of the pathogen **IZ**: Inhibition zone in cm  
**PIMG**: Per cent inhibition of mycelial growth

**Supplementary Figure S1:** Paired antibiosis assay for antifungal activity of actinobacterial isolates against chilli fruit rot pathogens

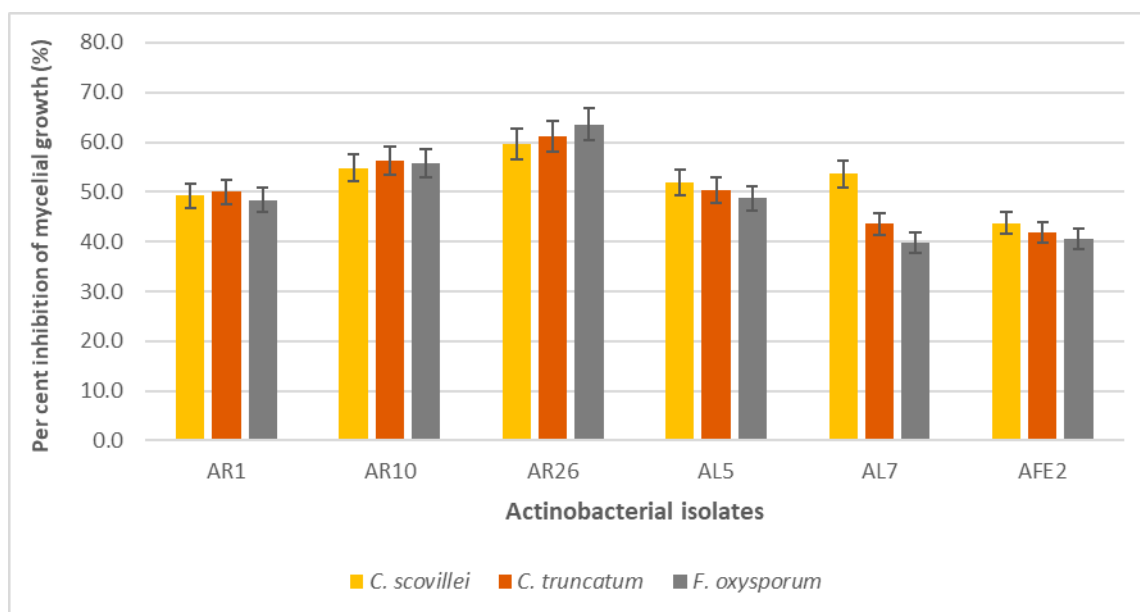

**Supplement Figure S2:** Relative ability of actinobacterial isolates to produce siderophore and extracellular hydrolytic enzymes

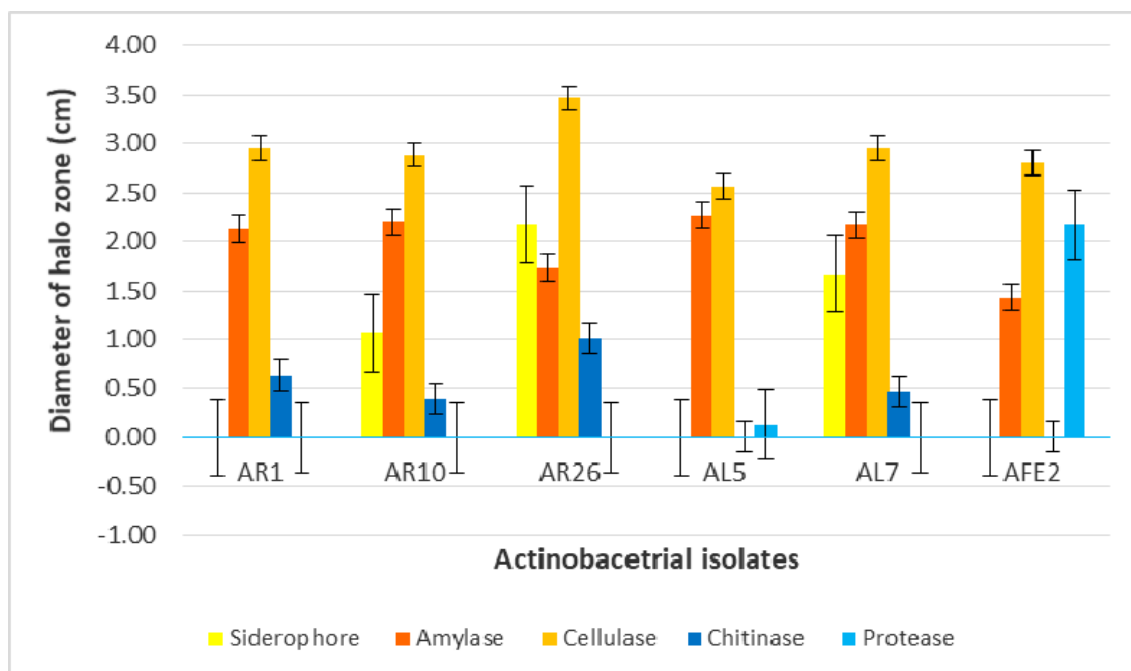

**Supplementary Figure S3:** Screening of actinobacterial isolates for amylase activity

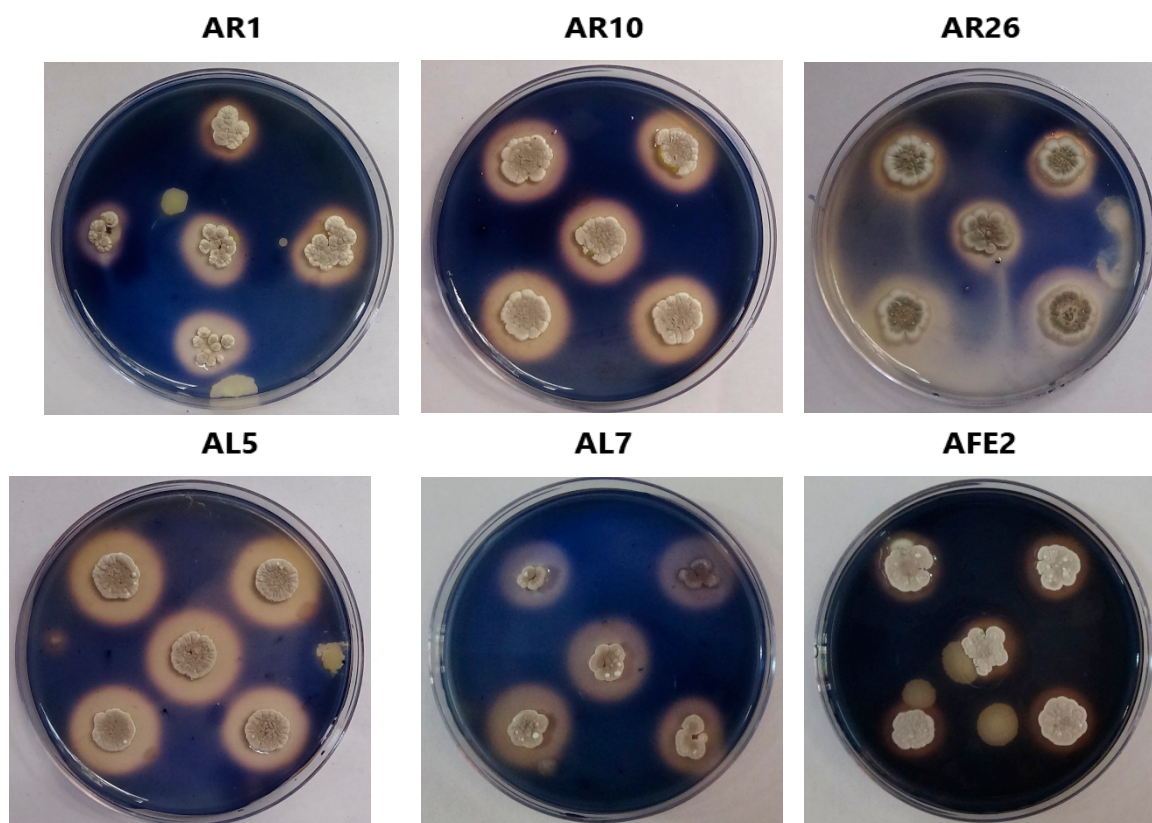

**Supplementary Figure S4:** Screening of actinobacterial isolates for cellulase activity

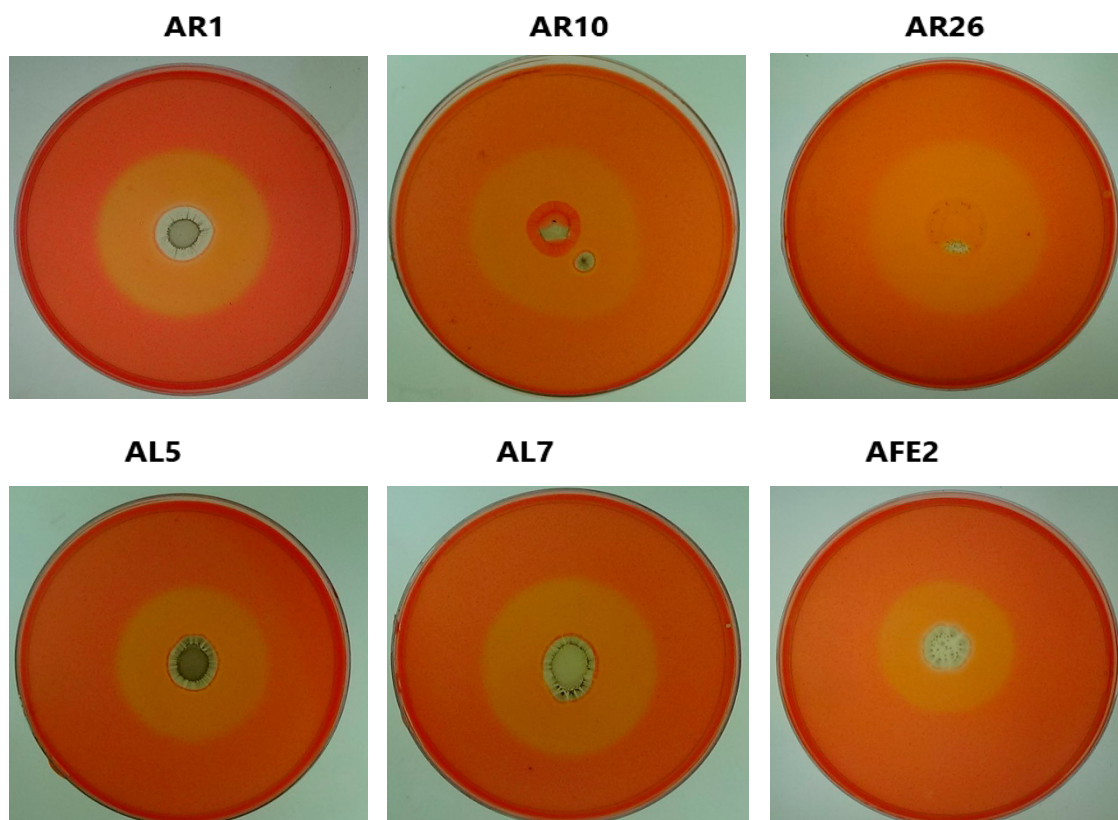



**Supplementary Figure S5:** Screening of actinobacterial isolates for chitinase activity

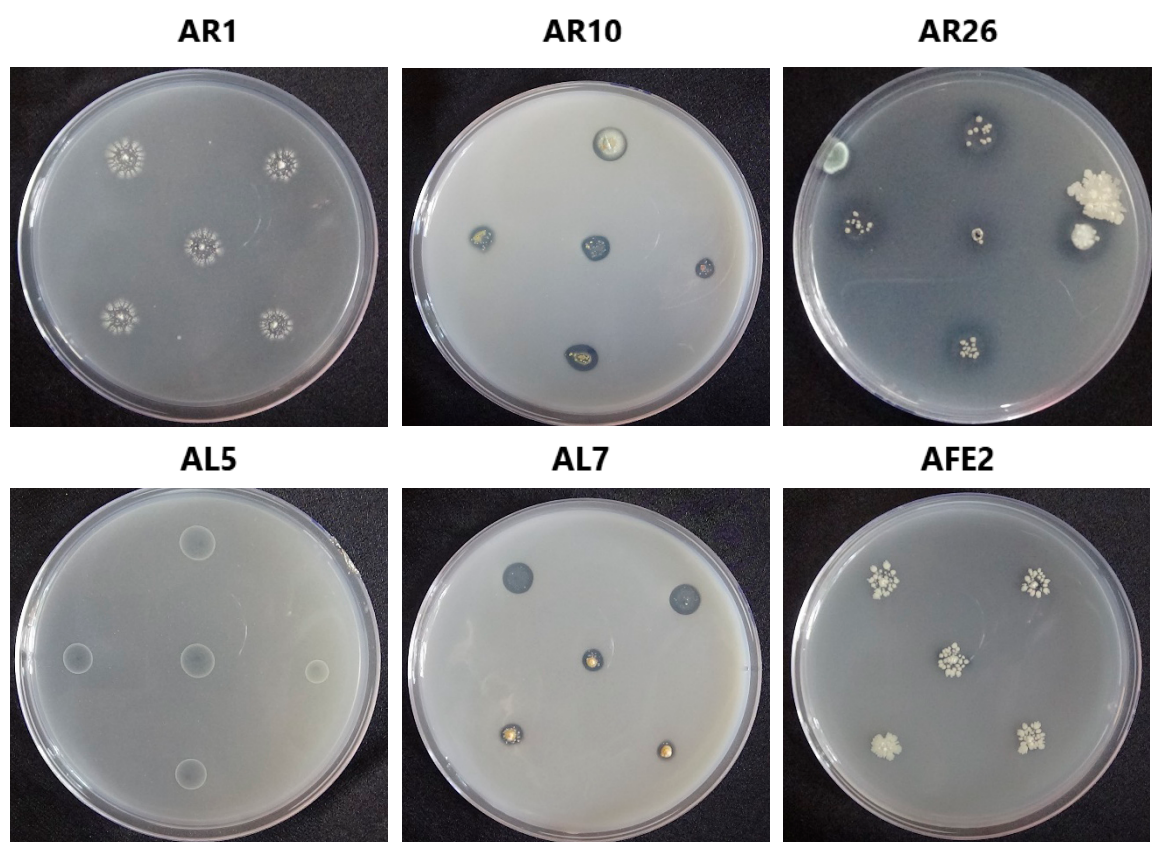

**Supplementary Figure S6:** Screening of actinobacterial isolates for protease activity

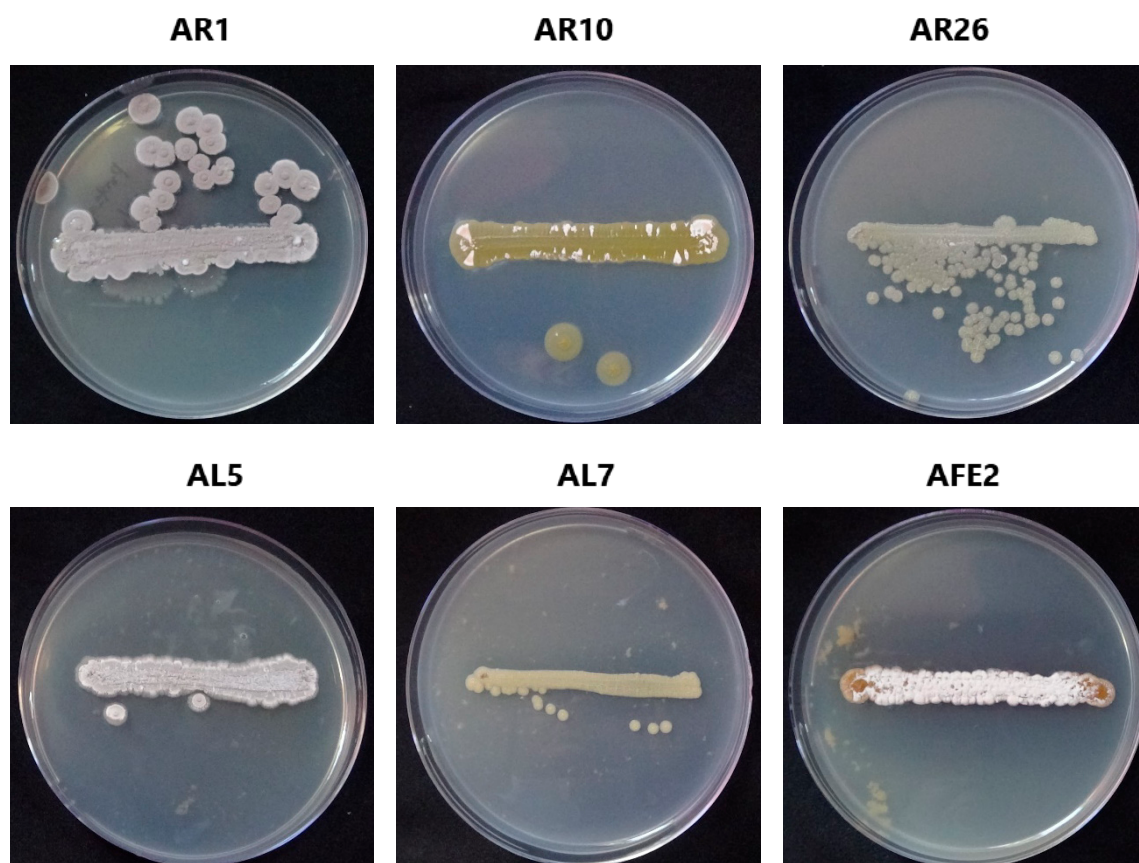

**Supplementary Figure S7:** Screening of actinobacterial isolates for siderophore production

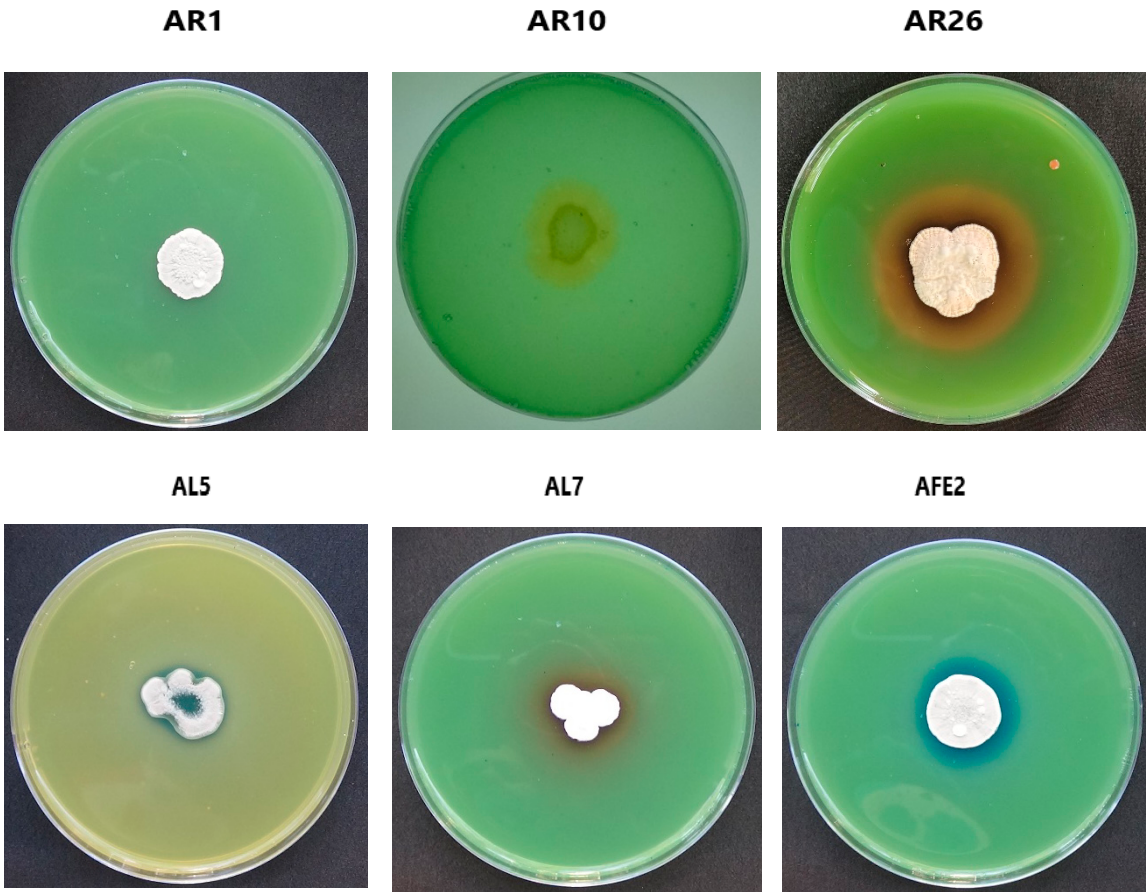

Supplement: s1 [file s1]
